# Supplementary material
Source: Elsevier journal article supplement (https://comptes-rendus.academie-sciences.fr/chimie/article/10.1016/j.crci.2010.04.020/file/attach/mmc3.pdf)

# checkCIF/PLATON report

No syntax errors found. CIF dictionary Interpreting this report

## Datablock: dg077\_hy\_dis01\_compound\_6f

---

Bond precision: C-C = 0.0058 A Wavelength=0.71073  
Cell: a=15.017(2) b=8.913(1) c=13.245(1)  
alpha=90 beta=98.21(1) gamma=90  
Temperature: 123 K

|                | Calculated              | Reported                |
|----------------|-------------------------|-------------------------|
| Volume         | 1754.6(3)               | 1754.6(3)               |
| Space group    | P 21/c                  | P 21/c                  |
| Hall group     | -P 2ybc                 | ?                       |
| Moiety formula | C13 H20 N2 P, C F3 O3 S | C13 H20 N2 P, C F3 O3 S |
| Sum formula    | C14 H20 F3 N2 O3 P S    | C14 H20 F3 N2 O3 P S    |
| Mr             | 384.36                  | 384.35                  |
| Dx,g cm-3      | 1.455                   | 1.455                   |
| Z              | 4                       | 4                       |
| Mu (mm-1)      | 0.321                   | 0.321                   |
| F000           | 800.0                   | 800.0                   |
| F000'          | 801.36                  |                         |
| h,k,lmax       | 17,10,15                | 17,10,15                |
| Nref           | 3096                    | 3086                    |
| Tmin,Tmax      | 0.962,0.984             |                         |
| Tmin'          | 0.880                   |                         |

Correction method= Not given

Data completeness= 0.997 Theta(max)= 25.020

R(reflections)= 0.0574( 1896) wR2(reflections)= 0.1433( 3086)

S = 1.030 Npar= 217

---

The following ALERTS were generated. Each ALERT has the format

**test-name\_ALERT\_alert-type\_alert-level.**

Click on the hyperlinks for more details of the test.

---

### Alert level C

|                   |                       |                                           |                       |      |       |
|-------------------|-----------------------|-------------------------------------------|-----------------------|------|-------|
| PLAT222_ALERT_3_C | Large Non-Solvent     | H                                         | Ueq(max)/Ueq(min) ... | 3.09 | Ratio |
| PLAT340_ALERT_3_C | Low Bond Precision on | C-C Bonds (x 1000)                        | Ang ..                | 6    |       |
| PLAT244_ALERT_4_C | Low                   | 'Solvent' Ueq as Compared to Neighbors of |                       | S1   |       |
| PLAT244_ALERT_4_C | Low                   | 'Solvent' Ueq as Compared to Neighbors of |                       | C1   |       |

---

● **Alert level G**

PLAT380\_ALERT\_4\_G Check Incorrectly? Oriented X(sp2)-Methyl Moiety

C16

---

0 **ALERT level A** = In general: serious problem  
0 **ALERT level B** = Potentially serious problem  
4 **ALERT level C** = Check and explain  
1 **ALERT level G** = General alerts; check

0 ALERT type 1 CIF construction/syntax error, inconsistent or missing data  
0 ALERT type 2 Indicator that the structure model may be wrong or deficient  
2 ALERT type 3 Indicator that the structure quality may be low  
3 ALERT type 4 Improvement, methodology, query or suggestion  
0 ALERT type 5 Informative message, check

---

---

### **Publication of your CIF in IUCr journals**

**A basic structural check has been run on your CIF. These basic checks will be run on all CIFs submitted for publication in IUCr journals (*Acta Crystallographica*, *Journal of Applied Crystallography*, *Journal of Synchrotron Radiation*); however, if you intend to submit to *Acta Crystallographica Section C* or *E*, you should make sure that full publication checks are run on the final version of your CIF prior to submission.**

### **Publication of your CIF in other journals**

**Please refer to the *Notes for Authors* of the relevant journal for any special instructions relating to CIF submission.**

---

**PLATON version of 13/08/2009; check.def file version of 12/08/2009**

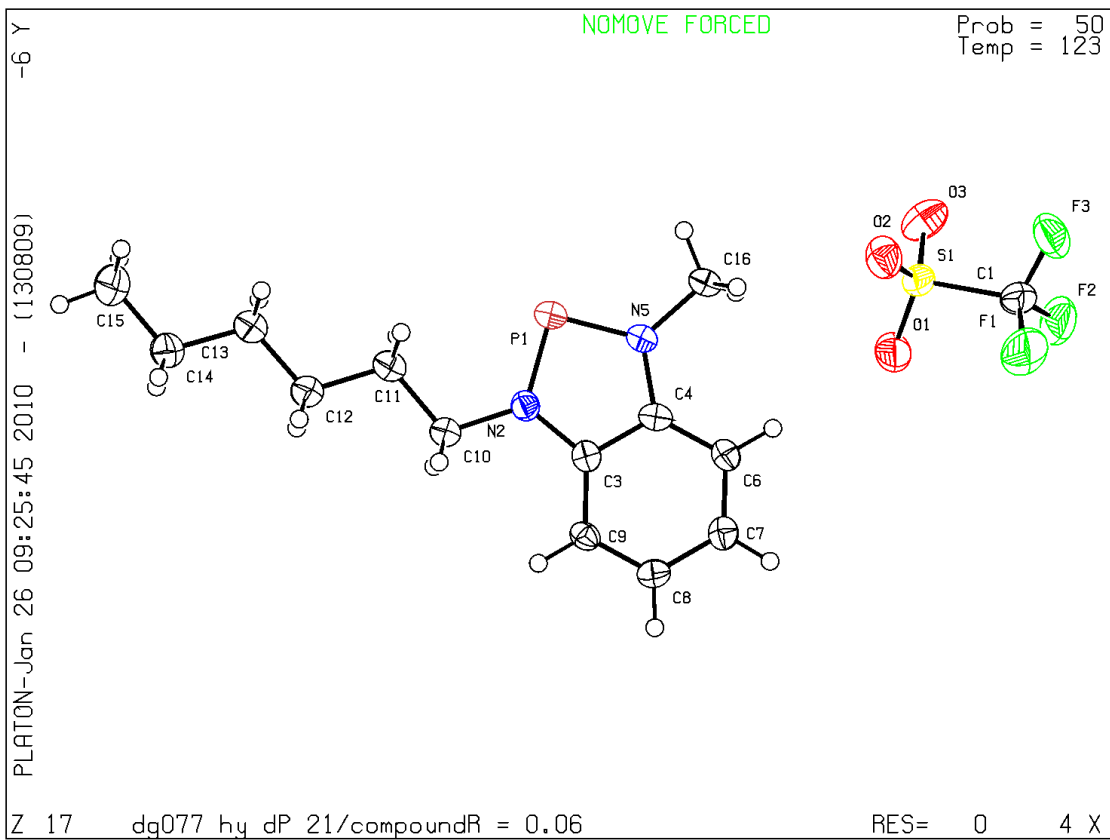

Supplement: mmc3 [file mmc3.pdf]
